# Supplementary material for: Caenorhabditis elegans is a useful model for anthelmintic discovery
Source: PubMed Central journal article supplement (PMC4491176; doi:10.1038/ncomms8485), 2015-06-25
Supplement: ncomms8485-s1.pdf [file ncomms8485-s1.pdf]

## Supplementary Figure 1.

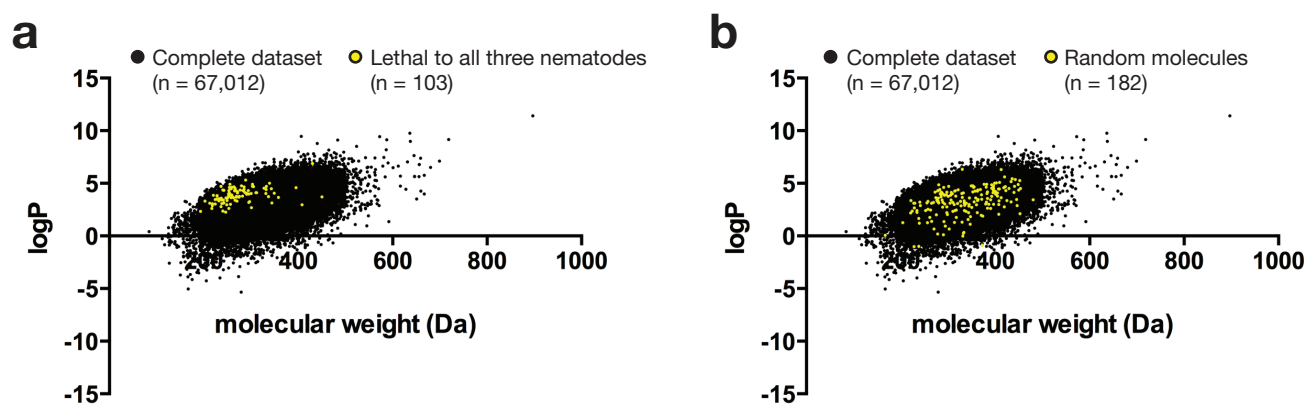

**Supplementary Figure 1. Nematicides are generally small and hydrophobic. (a)** Plot of logP versus molecular weight for the complete set of 67,012 molecules screened in *C. elegans*; the molecules that are lethal to all three nematode species tested are highlighted in yellow. **(b)** Plot of logP versus molecular weight for the complete set of 67,012 molecules screened in *C. elegans*; the set of 182 randomly-selected molecules is highlighted in yellow.

## Supplementary Figure 2.

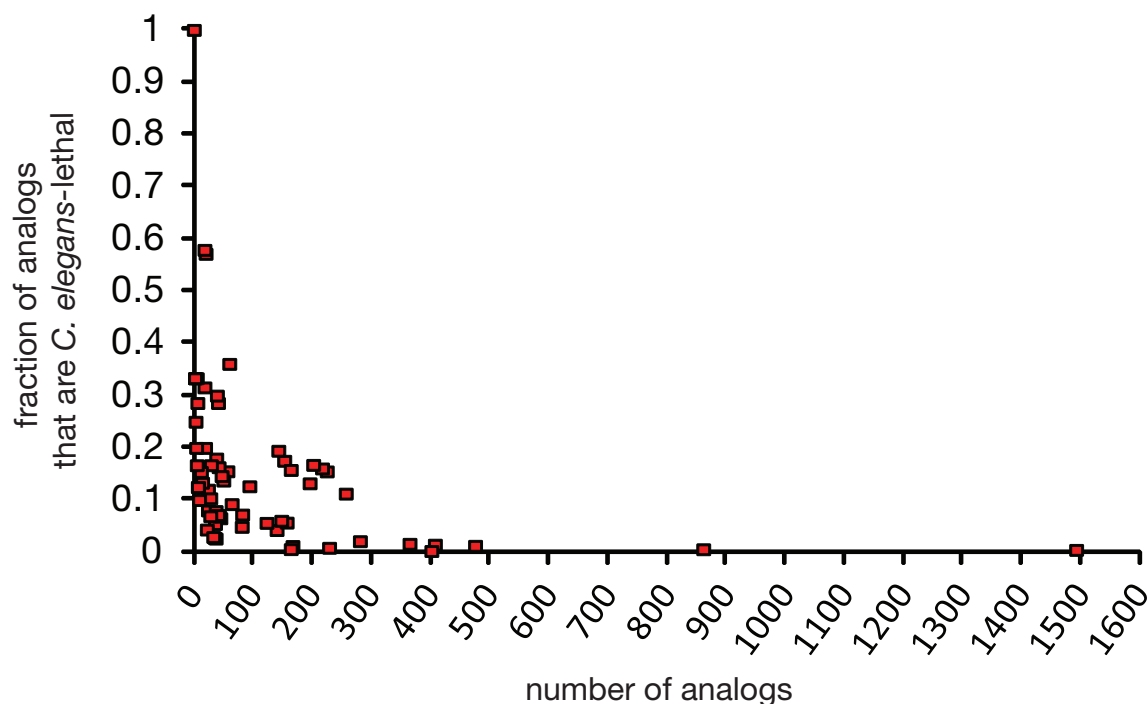

**Supplementary Figure 2. Most group 2 wactives are in structural analog families for which more than 10% of the analogs are lethal to *C. elegans*.** The 67 individual data points in the plot represent the structural analog families for each of the 67 group 2 wactives. The structural analog family for each group 2 wactive is composed of the individual group 2 compound itself, along with all of the molecules in the 67,012-compound dataset that have a pair-wise Tanimoto/FP2 structural similarity of 0.55 or greater with the group 2 wactive. The fraction of analogs within the structural analog family that is lethal to *C. elegans* is plotted on the y-axis. The number of analogs in the family is plotted on the x-axis.

# Supplementary Figure 3.

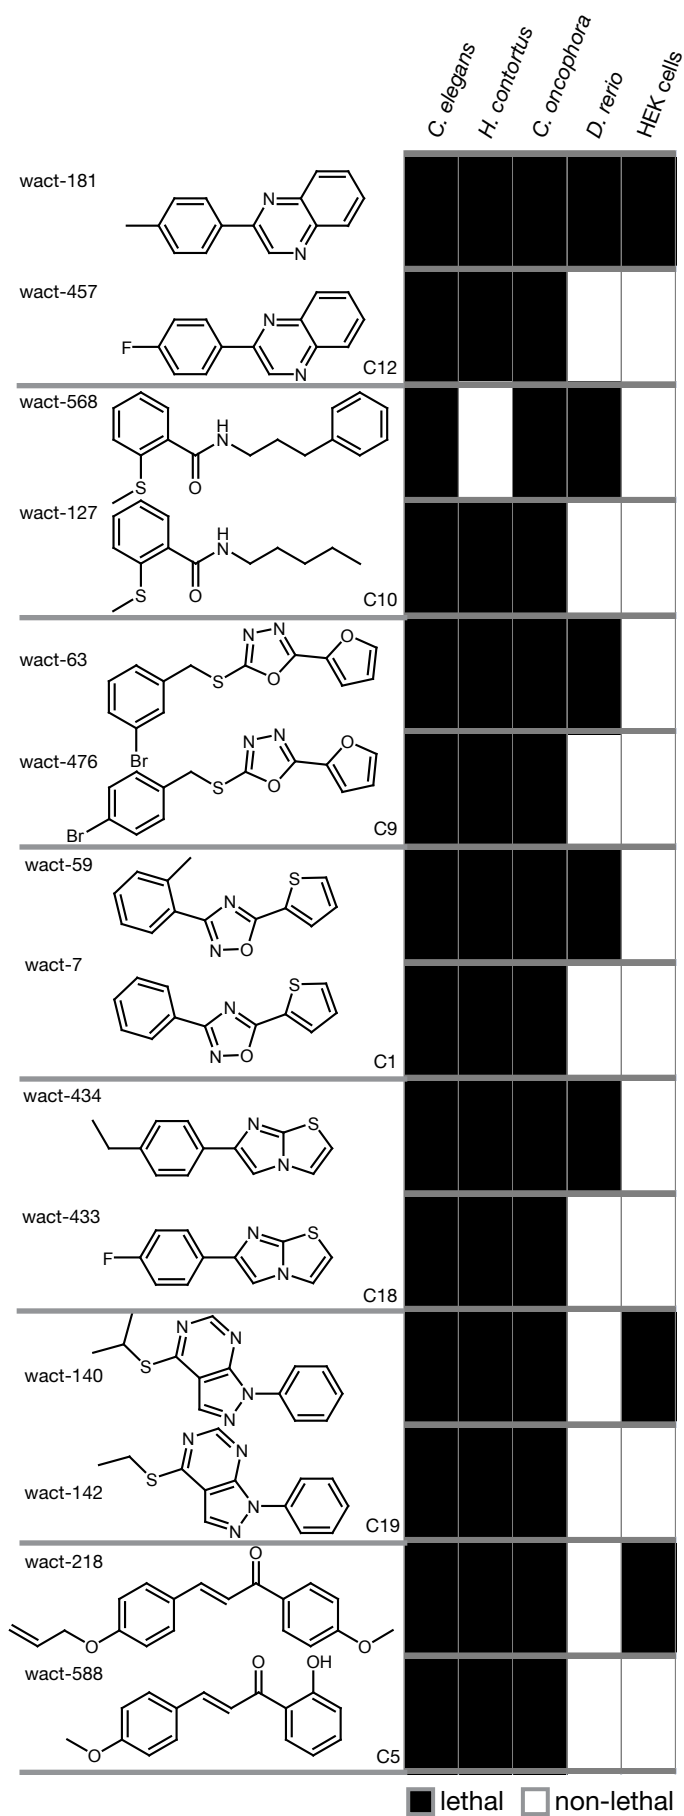

■ lethal □ non-lethal

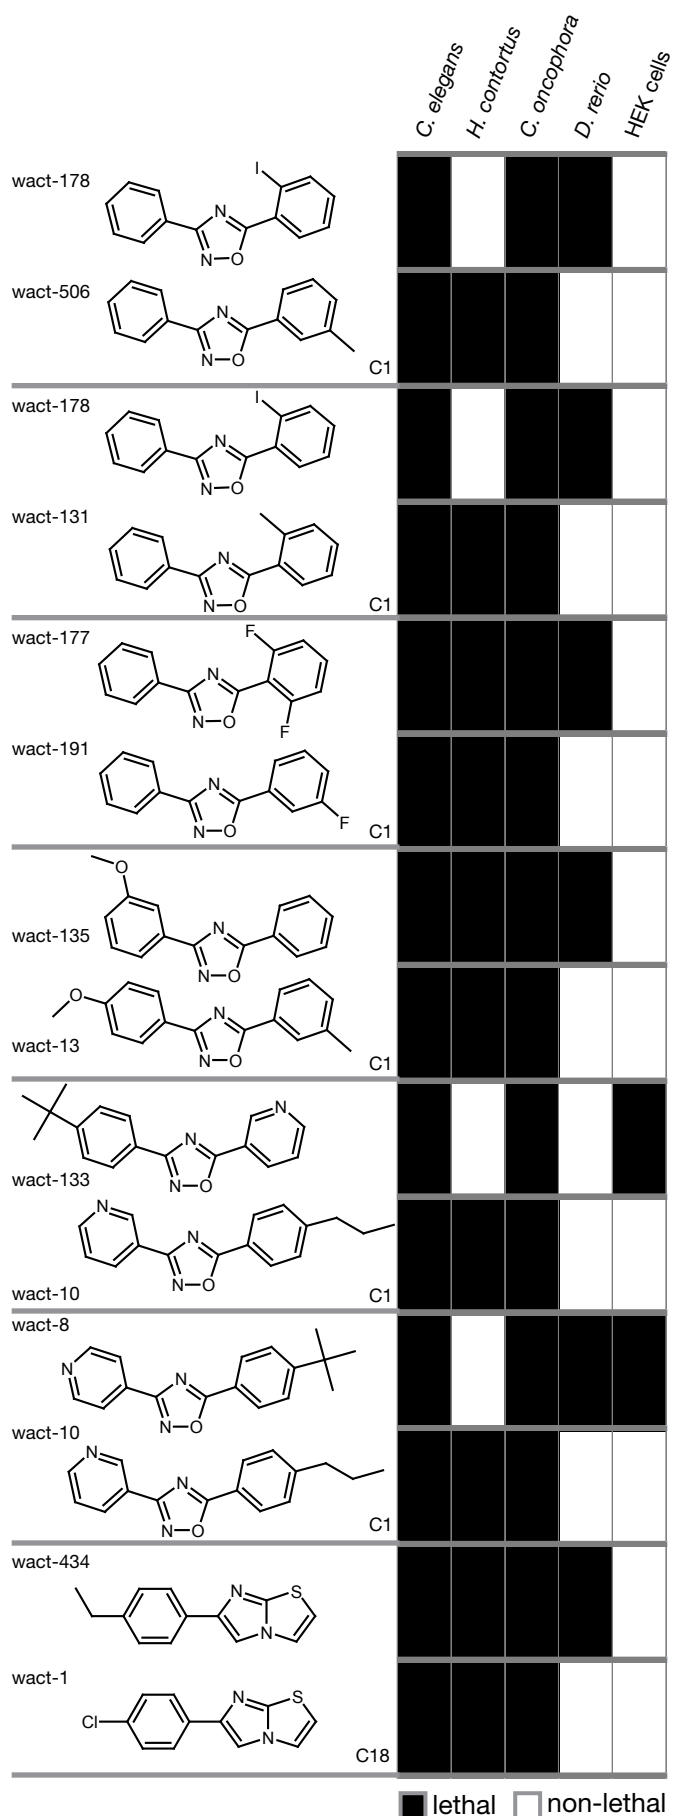

■ lethal □ non-lethal

## Supplementary Figure 3 (continued).

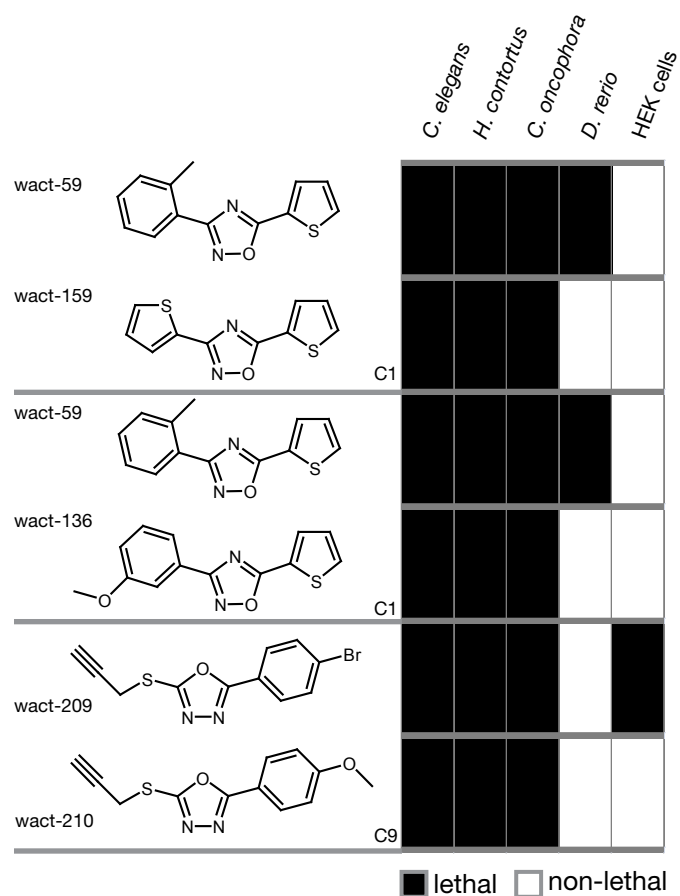

**Supplementary Figure 3. Small changes in structure can alter the phylogenetic selectivity of small-molecule-induced lethality.** The cross-species lethality profiles for the seventeen pairs of molecules having Tanimoto/FP2 similarity scores greater than 0.8, and for which one molecule of the pair is in group 2 (nematode-restricted lethality) and the other is in group 3 (lethal to a vertebrate system). The network cluster to which each pair belongs is indicated (see Fig. 2b for the corresponding cluster). See Methods for a description of the small molecule screening assays, and the definition of lethality for each organism or cell type.



# Supplementary Figure 5.

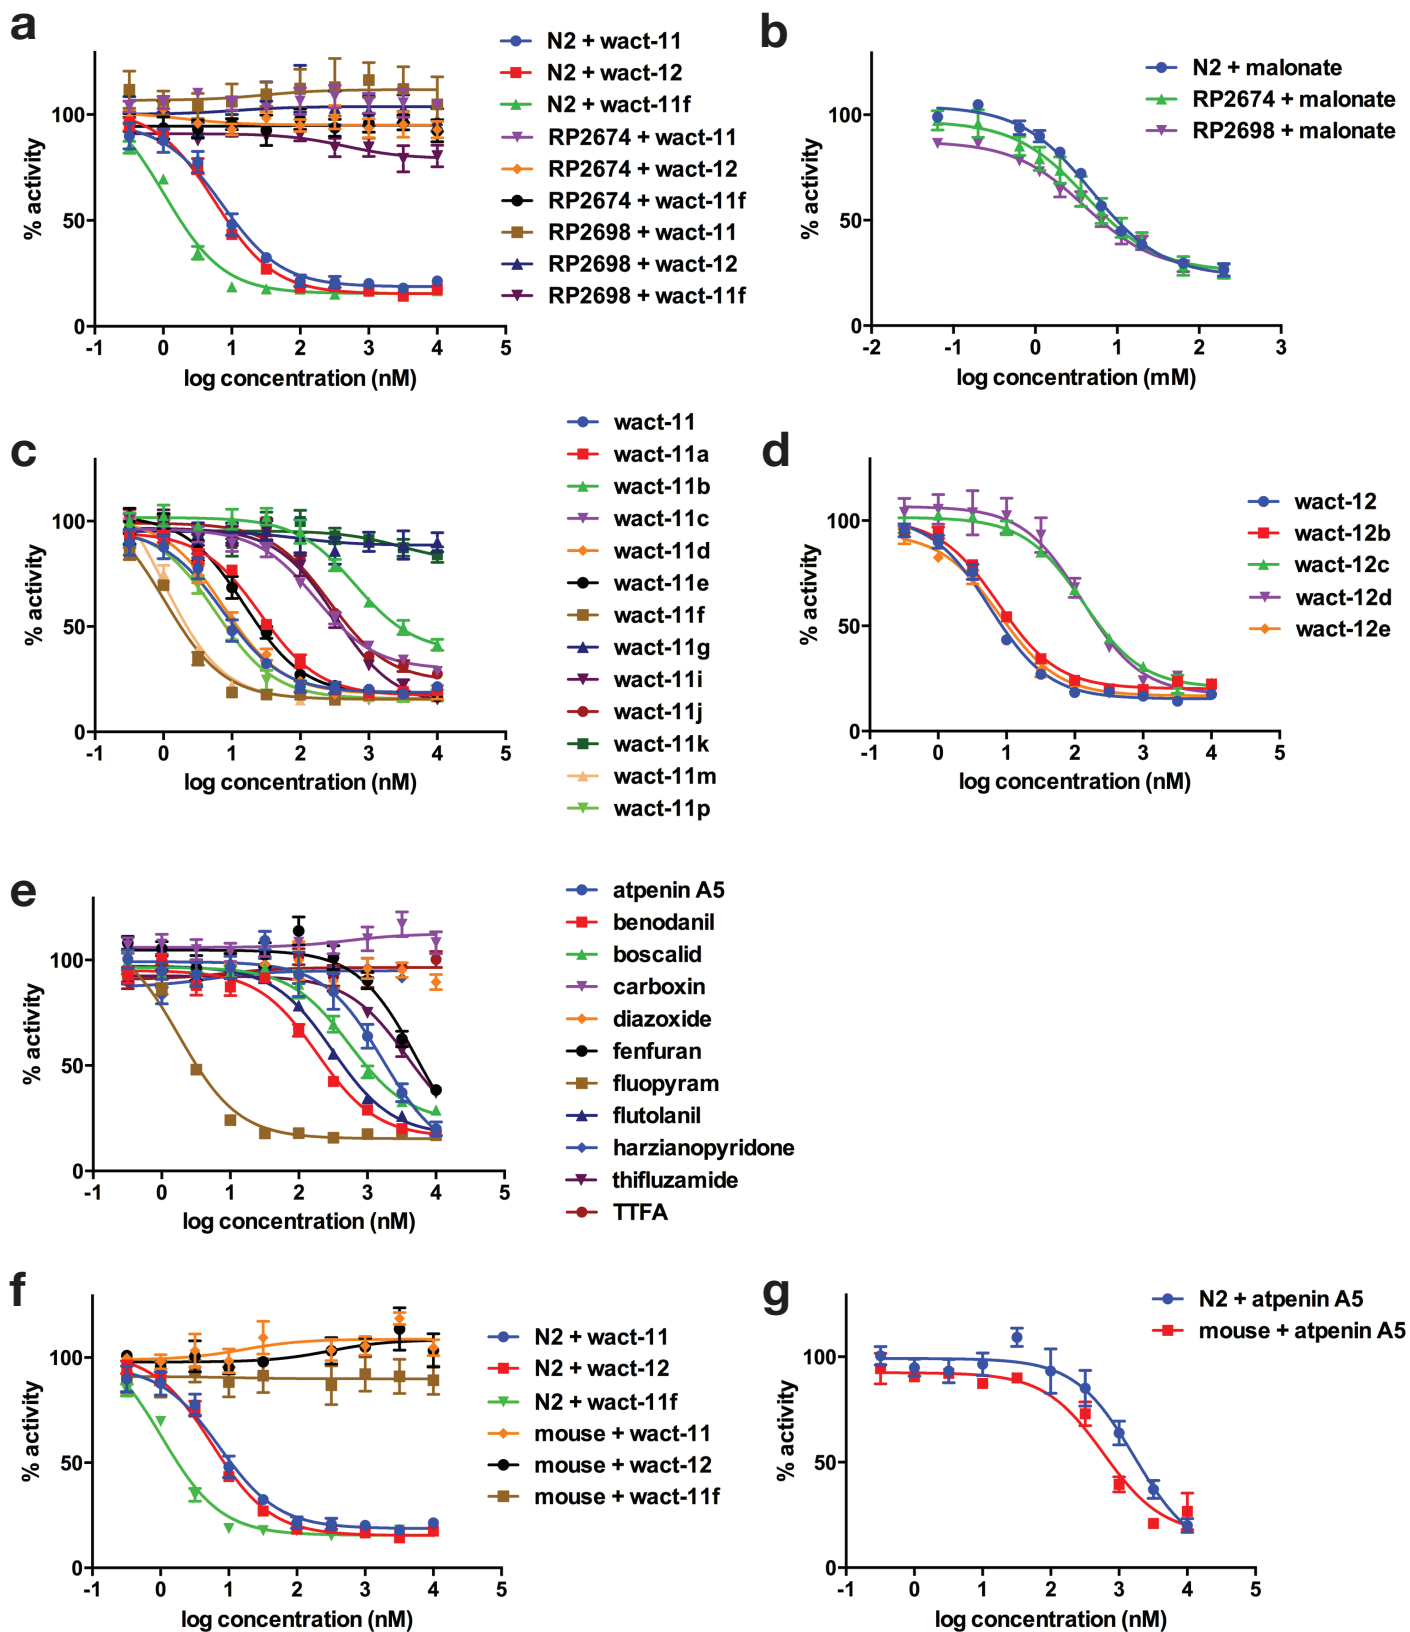

## Supplementary Figure 5 (continued).

**Supplementary Figure 5 . Complex II inhibitory dose-response curves.** Inhibitory dose-response curves for: **(a)** wact-11, wact-12, and wact-11f against complex II from wild type (N2) worms, and the wact-11-family resistant mutants RP2674 and RP2698; **(b)** malonate against complex II from N2 worms, as well as RP2674 and RP2698; **(c)** wact-11 and wact-11 analogs against complex II from N2 worms; **(d)** wact-12 and wact-12 analogs against complex II from N2 worms; **(e)** established complex II inhibitors against complex II from N2 worms; **(f)** wact-11, wact-12, and wact-11f against complex II from N2 worms and mouse liver; **(g)** atpenin A5 against complex II from N2 worms and mouse liver. Error bars represent the standard error of the mean for four replicate trials.

## Supplementary Figure 6.

**a**

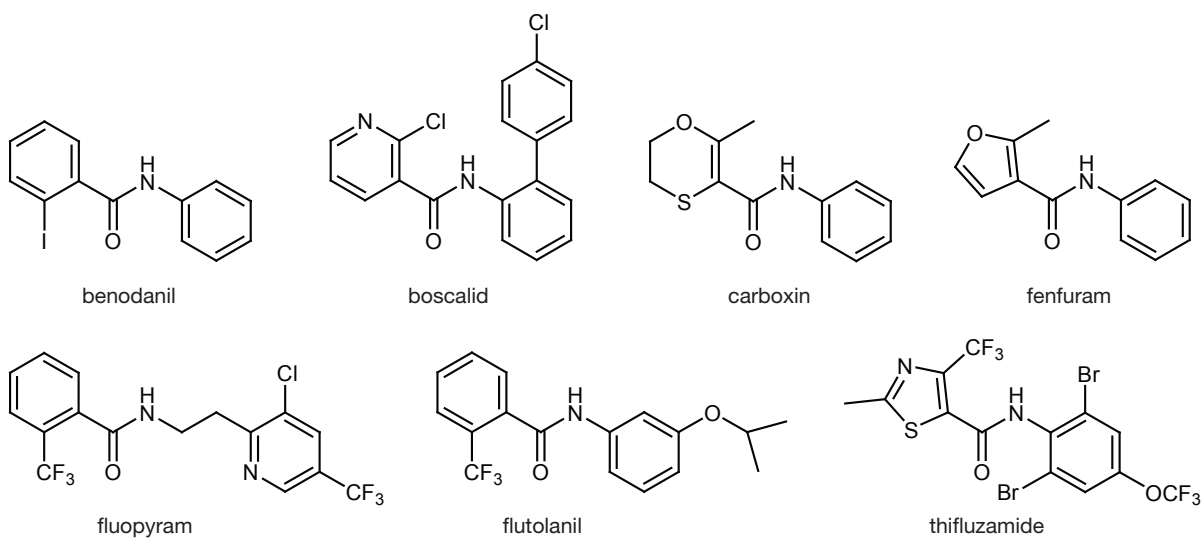

**b**

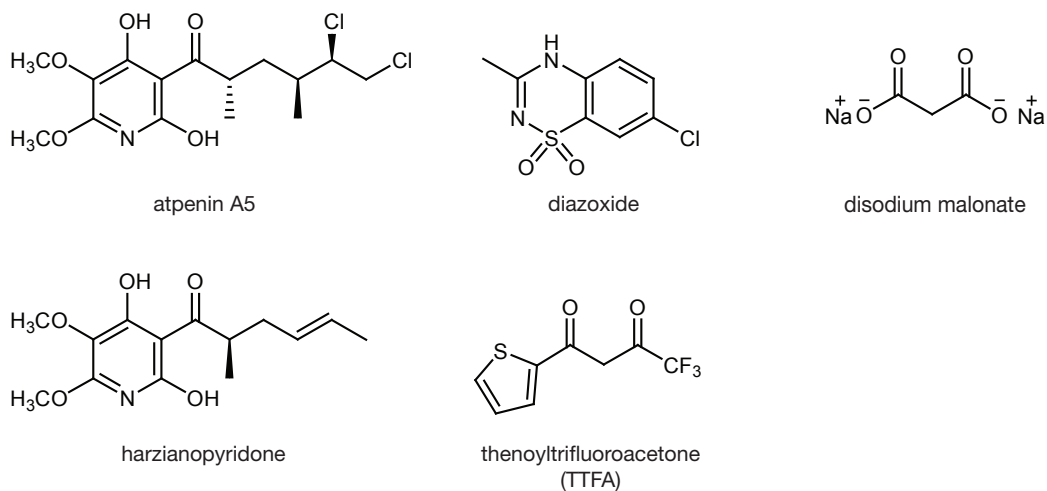

**Supplementary Figure 6. Established complex II inhibitors tested for nematicidal activity in *C. elegans*.** (a) Complex II inhibitors that share structural similarity with the wact-11-family. (b) Complex II inhibitors that are structurally unrelated to the wact-11-family.



## Supplementary Figure 7.

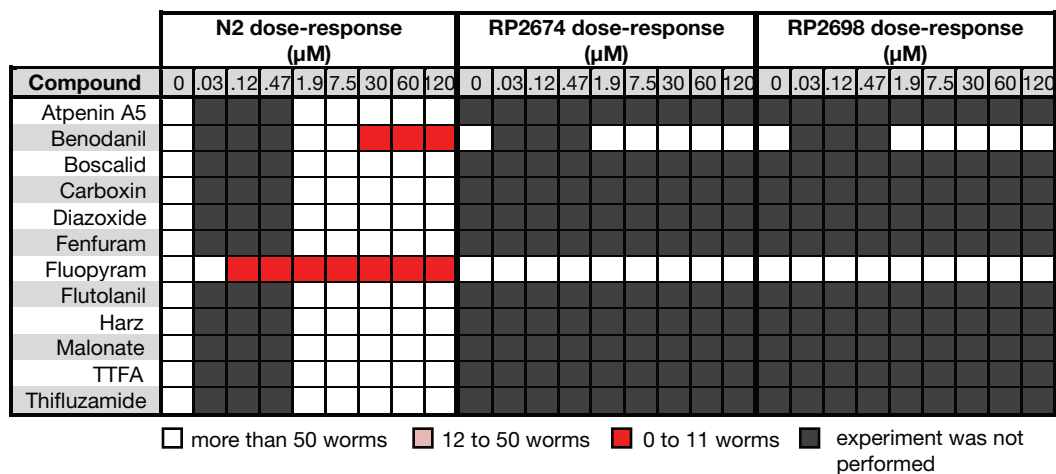

**Supplementary Figure 7. Dose-response experiments for known complex II inhibitors.** Heat maps are shown for the complex II inhibitor dose-response experiments with wild type worms (N2 strain), as well as two mutant strains, RP2674 and RP2698, isolated as being resistant to wact-12 and wact-11, respectively. The dose-response experiments were carried out using a 96-well plate liquid-based assay (see Methods). The structures of the complex II inhibitors are shown in Supplementary Figure 6. Harz is harzianopyridone and TTFA is thenoyltrifluoroacetone.



## Supplementary Figure 8 (continued).

**Supplementary Figure 8. Complex II residues that confer wact-11-family resistance when mutated are conserved among nematodes. (a)** Sequence alignments for selected regions of Complex II subunits SDHB, SDHC, and SDHD from *C. elegans* and 9 distinct nematode species. The phylogenetic clade for each nematode species is indicated in square parentheses. The *C. elegans* complex II residues that confer wact-11-family resistance when mutated are underlined, and the mutant residues are indicated in red. The residues that are highlighted in grey are identical to the corresponding *C. elegans* residue. The residues that are highlighted in black are distinct from the corresponding *C. elegans* residue. Asterisks denote residues that are within 4 Å of a flutolanil molecule bound at the Q-site of *A. suum* Complex II (see Figure 4). **(b)** Sequence alignments for selected regions of Complex II subunits SDHB, SDHC, and SDHD from *C. elegans*, 3 distinct nematode species, and 7 vertebrate species. Sequence alignments were performed using ClustalW 2.1. All nematode sequences were obtained from WormBase (<http://www.wormbase.org>). All vertebrate sequences were obtained from the National Center for Biotechnology Information protein database.

**Supplementary Table 1. Summary of the genetic screens for wactive-resistant mutants**

| Chemical ID | Chemical Name | Bioactivity Group # <sup>a</sup> | Generation Screened <sup>b</sup> | Mutagen <sup>c</sup> | Number of Genomes Screened | Number of Resistant Mutants Obtained | Strain Name | Allele Name |
|-------------|---------------|----------------------------------|----------------------------------|----------------------|----------------------------|--------------------------------------|-------------|-------------|
| 6222549     | wact-11       | 2                                | F1                               | EMS                  | 1,300,000                  | 13                                   | RP2661      | tr380       |
|             |               |                                  |                                  |                      |                            |                                      | RP2668      | tr387       |
|             |               |                                  |                                  |                      |                            |                                      | RP2689      | tr401       |
|             |               |                                  |                                  |                      |                            |                                      | RP2696      | tr405       |
|             |               |                                  |                                  |                      |                            |                                      | RP2697      | tr406       |
|             |               |                                  |                                  |                      |                            |                                      | RP2698      | tr407       |
|             |               |                                  |                                  |                      |                            |                                      | RP2699      | tr408       |
|             |               |                                  |                                  |                      |                            |                                      | RP2700      | tr409       |
|             |               |                                  |                                  |                      |                            |                                      | RP2702      | tr410       |
|             |               |                                  |                                  |                      |                            |                                      | RP2703      | tr411       |
|             |               |                                  |                                  |                      |                            |                                      | RP2704      | tr412       |
|             |               |                                  |                                  |                      |                            |                                      | RP2705      | tr413       |
|             |               |                                  |                                  |                      |                            |                                      | RP2706      | tr414       |
| 6222549     | wact-11       | 2                                | F2                               | EMS                  | 180,000                    | 2                                    | RP2667      | tr386       |
|             |               |                                  |                                  |                      |                            |                                      | RP2682      | tr395       |
| 7003409     | wact-12       | 2                                | F1                               | EMS                  | 1,000,000                  | 10                                   | RP2635      | tr355       |
|             |               |                                  |                                  |                      |                            |                                      | RP2636      | tr356       |
|             |               |                                  |                                  |                      |                            |                                      | RP2669      | tr388       |
|             |               |                                  |                                  |                      |                            |                                      | RP2670      | tr389       |
|             |               |                                  |                                  |                      |                            |                                      | RP2671      | tr390       |
|             |               |                                  |                                  |                      |                            |                                      | RP2673      | tr392       |
|             |               |                                  |                                  |                      |                            |                                      | RP2674      | tr393       |
|             |               |                                  |                                  |                      |                            |                                      | RP2687      | tr399       |
|             |               |                                  |                                  |                      |                            |                                      | RP2688      | tr400       |
|             |               |                                  |                                  |                      |                            |                                      | RP2749      | tr424       |
| 7003409     | wact-12       | 2                                | F2                               | EMS                  | 240,000                    | 4                                    | RP2637      | tr357       |
|             |               |                                  |                                  |                      |                            |                                      | RP2639      | tr359       |
|             |               |                                  |                                  |                      |                            |                                      | RP2672      | tr391       |
|             |               |                                  |                                  |                      |                            |                                      | RP2683      | tr396       |
| 7962412     | wact-127      | 2                                | F1                               | EMS                  | 980,000                    | 8                                    | RP2748      | tr423       |
|             |               |                                  |                                  |                      |                            |                                      | RP2768      | tr436       |
|             |               |                                  |                                  |                      |                            |                                      | RP2776      | tr438       |
|             |               |                                  |                                  |                      |                            |                                      | RP2777      | tr439       |
|             |               |                                  |                                  |                      |                            |                                      | RP2778      | tr440       |
|             |               |                                  |                                  |                      |                            |                                      | RP2813      | tr454       |
|             |               |                                  |                                  |                      |                            |                                      | RP2814      | tr455       |
| RP2815      | tr456         |                                  |                                  |                      |                            |                                      |             |             |
| 7640928     | wact-86       | 3                                | F1                               | EMS                  | 1,600,000                  | 2                                    | RP2809      | tr452       |
|             |               |                                  |                                  |                      |                            |                                      | RP2962      | tr482       |

|         |          |   |    |     |           |    |        |       |
|---------|----------|---|----|-----|-----------|----|--------|-------|
|         |          |   | F2 | EMS | 100,000   | 0  |        |       |
|         |          |   | F1 | ENU | 1,200,000 | 1  | RP2878 | tr457 |
| 9013615 | wact-154 | 1 | F1 | EMS | 1,600,000 | 0  |        |       |
|         |          |   | F2 | EMS | 16,000    | 2  | RP2758 | tr433 |
|         |          |   |    |     |           |    | RP2759 | tr434 |
| 9036812 | wact-190 | 1 | F1 | EMS | 200,000   | 0  |        |       |
|         |          |   | F2 | EMS | 1,100,000 | 33 | RP2785 | tr441 |
|         |          |   |    |     |           |    | RP2786 | tr442 |
|         |          |   |    |     |           |    | RP2787 | tr443 |
|         |          |   |    |     |           |    | RP2788 | tr444 |
|         |          |   |    |     |           |    | RP2796 | tr445 |
|         |          |   |    |     |           |    | RP2797 | tr446 |
|         |          |   |    |     |           |    | RP2798 | tr447 |
|         |          |   |    |     |           |    | RP2799 | tr448 |
|         |          |   |    |     |           |    | RP2800 | tr449 |
|         |          |   |    |     |           |    | RP2801 | tr450 |
|         |          |   |    |     |           |    | RP2802 | tr451 |
|         |          |   |    |     |           |    | RP2896 | tr458 |
|         |          |   |    |     |           |    | RP2897 | tr459 |
|         |          |   |    |     |           |    | RP2898 | tr460 |
|         |          |   |    |     |           |    | RP2899 | tr461 |
|         |          |   |    |     |           |    | RP2900 | tr462 |
|         |          |   |    |     |           |    | RP2901 | tr463 |
|         |          |   |    |     |           |    | RP2902 | tr464 |
|         |          |   |    |     |           |    | RP2903 | tr465 |
|         |          |   |    |     |           |    | RP2904 | tr466 |
|         |          |   |    |     |           |    | RP2905 | tr467 |
|         |          |   |    |     |           |    | RP2906 | tr468 |
|         |          |   |    |     |           |    | RP2907 | tr469 |
|         |          |   |    |     |           |    | RP2908 | tr470 |
|         |          |   |    |     |           |    | RP2909 | tr471 |
|         |          |   |    |     |           |    | RP2940 | tr472 |
|         |          |   |    |     |           |    | RP2941 | tr473 |
|         |          |   |    |     |           |    | RP2942 | tr474 |
|         |          |   |    |     |           |    | RP2943 | tr475 |
|         |          |   |    |     |           |    | RP2944 | tr476 |
|         |          |   |    |     |           |    | RP2945 | tr477 |
|         |          |   |    |     |           |    | RP2956 | tr480 |
|         |          |   |    |     |           |    | RP2957 | tr481 |
| 5784060 | emb-d    | 2 | F1 | EMS | 270,000   | 0  |        |       |
|         |          |   | F2 | EMS | 100,000   | 0  |        |       |
|         |          |   | F1 | ENU | 320,000   | 0  |        |       |

|          |          |   |    |     |         |   |
|----------|----------|---|----|-----|---------|---|
| BTB05020 | emb-q    | 1 | F1 | EMS | 200,000 | 0 |
| 5185411  | wact-2   | 1 | F1 | EMS | 150,000 | 0 |
|          |          |   | F2 | EMS | 80,000  | 0 |
| 5347759  | wact-3   | 2 | F1 | EMS | 270,000 | 0 |
|          |          |   | F2 | EMS | 100,000 | 0 |
|          |          |   | F1 | ENU | 320,000 | 0 |
| 5352487  | wact-4   | 2 | F1 | EMS | 620,000 | 0 |
|          |          |   | F2 | EMS | 150,000 | 0 |
| 5352532  | wact-5   | 2 | F1 | EMS | 80,000  | 0 |
|          |          |   | F2 | EMS | 40,000  | 0 |
| 5419367  | wact-6   | 3 | F1 | EMS | 128,000 | 0 |
|          |          |   | F2 | EMS | 86,000  | 0 |
| 5652963  | wact-7   | 2 | F1 | EMS | 200,000 | 0 |
|          |          |   | F2 | EMS | 86,000  | 0 |
| 5652977  | wact-8   | 3 | F1 | EMS | 100,000 | 0 |
| 5905384  | wact-10  | 2 | F1 | EMS | 80,000  | 0 |
|          |          |   | F2 | EMS | 50,000  | 0 |
| 7632721  | wact-13  | 2 | F1 | EMS | 80,000  | 0 |
|          |          |   | F2 | EMS | 100,000 | 0 |
| 7635413  | wact-14  | 2 | F1 | EMS | 310,000 | 0 |
|          |          |   | F2 | EMS | 40,000  | 0 |
| 7721223  | wact-16  | 2 | F1 | EMS | 420,000 | 0 |
|          |          |   | F2 | EMS | 150,000 | 0 |
|          |          |   | F1 | ENU | 320,000 | 0 |
| 5688274  | wact-55  | 2 | F1 | EMS | 190,000 | 0 |
|          |          |   | F2 | EMS | 100,000 | 0 |
| 7662831  | wact-89  | 3 | F1 | EMS | 100,000 | 0 |
|          |          |   | F2 | EMS | 50,000  | 0 |
| 7834045  | wact-113 | 2 | F1 | EMS | 260,000 | 0 |
|          |          |   | F2 | EMS | 100,000 | 0 |
| 7971816  | wact-128 | 2 | F1 | EMS | 100,000 | 0 |
|          |          |   | F2 | EMS | 100,000 | 0 |
| 9000613  | wact-139 | 2 | F1 | EMS | 100,000 | 0 |
|          |          |   | F2 | EMS | 50,000  | 0 |
|          |          |   | F1 | ENU | 320,000 | 0 |
| 9001112  | wact-140 | 3 | F1 | EMS | 100,000 | 0 |
|          |          |   | F2 | EMS | 50,000  | 0 |
| 9010179  | wact-145 | 3 | F1 | EMS | 100,000 | 0 |
|          |          |   | F2 | EMS | 100,000 | 0 |
| 9017143  | wact-159 | 2 | F1 | EMS | 100,000 | 0 |
|          |          |   | F2 | EMS | 50,000  | 0 |
| 9023097  | wact-166 | 3 | F1 | EMS | 100,000 | 0 |

|               |          |   |            |     |                   |           |
|---------------|----------|---|------------|-----|-------------------|-----------|
| 9023309       | wact-167 | 2 | F1         | EMS | 80,000            | 0         |
|               |          |   | F2         | EMS | 50,000            | 0         |
| 9024879       | wact-169 | 1 | F1         | EMS | 100,000           | 0         |
|               |          |   | F2         | EMS | 100,000           | 0         |
| 9027529       | wact-175 | 2 | F1         | EMS | 100,000           | 0         |
| 9034543       | wact-184 | 1 | F1         | EMS | 100,000           | 0         |
|               |          |   | F2         | EMS | 100,000           | 0         |
| 9041446       | wact-197 | 2 | F1         | EMS | 100,000           | 0         |
|               |          |   | F2         | EMS | 100,000           | 0         |
| 5784085       | wact-220 | 1 | F1         | EMS | 420,000           | 0         |
|               |          |   | F2         | EMS | 100,000           | 0         |
| 5322542       | wact-396 | 2 | F1         | EMS | 100,000           | 0         |
| 5469460       | wact-419 | 2 | F1         | EMS | 100,000           | 0         |
| 6276968       | wact-457 | 2 | F1         | EMS | 100,000           | 0         |
| 9041091       | wact-579 | 2 | F1         | EMS | 100,000           | 0         |
|               |          |   | F2         | EMS | 50,000            | 0         |
|               |          |   | F1         | ENU | 860,000           | 0         |
| 9039813       | wact-614 | 3 | F1         | EMS | 100,000           | 0         |
| <b>TOTALS</b> |          |   | <b>F1</b>  |     | <b>15,478,000</b> | <b>34</b> |
|               |          |   | <b>F2</b>  |     | <b>3,718,000</b>  | <b>41</b> |
|               |          |   | <b>ALL</b> |     | <b>19,196,000</b> | <b>75</b> |

a. Group 1 molecules are lethal to only one or two of the three nematode species tested, but are non-lethal to zebrafish and HEK cells. Group 2 molecules are lethal to all three nematode species, but are non-lethal to zebrafish and human cells.

Group 3 molecule are lethal to fish or HEK cells, regardless of their nematode bioactivity profile.

b. F1 refers to the first filial generation, and F2 refers to the second filial generation.

c. EMS = ethyl methanesulfonate, and ENU = *N*-ethyl-*N*-nitrosourea
